# Supplementary material for: Pulse Spray Drying for Bovine Skimmed Milk Powder Production
Source: MDPI journal article supplement (doi:10.3390/foods13060869), 2024-03-13
Supplement: s1 [file s1]

**Table S1.** Raw values of all the studied parameters on skimmed milk powders obtained by Pulse Spray Drying (PSD) and Spray Drying (SD). BI: browning index, Sr: solubility index, Hr: Hausner ratio; [ $\alpha$ -La]:  $\alpha$ -Lactalbumin, [ $\beta$ -Lg]:  $\beta$ -Lactoglobulin. \*(n=2); +(n=4)

| T<br>(°C) | DT  | [ $\alpha$ -La] (g/Kg) | [ $\beta$ -Lg] (g/Kg) | Bulk<br>density<br>(g/mL) | Compressibility<br>(Carr Index)<br>(%) | H <sub>r</sub>     | BI                  | D <sub>10</sub> ( $\mu$ m) | D <sub>50</sub> ( $\mu$ m) | D <sub>90</sub> ( $\mu$ m) | Span               | D <sub>[3.2]</sub> ( $\mu$ m) | D <sub>[4.3]</sub> ( $\mu$ m) | L*                  | a*                  | b*                  | Moisture (%)       | Flowability<br>(g/min) | Solubility<br>Index (%) | Protein (%)         |
|-----------|-----|------------------------|-----------------------|---------------------------|----------------------------------------|--------------------|---------------------|----------------------------|----------------------------|----------------------------|--------------------|-------------------------------|-------------------------------|---------------------|---------------------|---------------------|--------------------|------------------------|-------------------------|---------------------|
| 70        | PSD | 9.65*                  | 40.04                 | 0.51                      | 35.71                                  | 1.56               | 15.49               | 13.90                      | 48.00                      | 147.00                     | 2.77               | 30.60                         | 69.30                         | 58.67               | -1.99               | 10.00               | 3.08               | 18.59                  | 98.60                   | 33.16               |
|           |     | 12.23                  | 54.49                 | 0.53                      | 34.74                                  | 1.53               | 16.53               | 12.05                      | 39.75                      | 104.15                     | 2.26               | 26.05                         | 50.73                         | 58.50               | -2.30               | 10.70               | 3.48               | 23.87                  | 98.61                   | 33.49               |
|           |     | <b>10.94 ± 1.83*</b>   | <b>47.27 ± 10.22</b>  | <b>0.52 ± 0.01</b>        | <b>35.23 ± 0.69</b>                    | <b>1.54 ± 0.02</b> | <b>16.01 ± 0.57</b> | <b>12.98 ± 1.31</b>        | <b>43.88 ± 5.83</b>        | <b>125.58 ± 30.30</b>      | <b>2.52 ± 0.36</b> | <b>28.33 ± 3.22</b>           | <b>60.01 ± 13.14</b>          | <b>58.58 ± 0.08</b> | <b>-2.15 ± 0.16</b> | <b>10.35 ± 0.35</b> | <b>3.28 ± 0.28</b> | <b>21.23 ± 3.74</b>    | <b>98.61 ± 0.01</b>     | <b>33.32 ± 0.24</b> |
|           | SD  | 10.38                  | 49.12                 | 0.47                      | 36.54                                  | 1.58               | 12.35               | 19.85                      | 55.75                      | 272.50                     | 4.51               | 41.95                         | 103.50                        | 61.62               | -2.07               | 8.79                | 4.02               | 11.02                  | 99.53                   | 34.35               |
|           |     | 13.38                  | 61.00                 | 0.56                      | 32.22                                  | 1.48               | 13.61               | 19.10                      | 55.80                      | 272.00                     | 4.55               | 41.90                         | 104.00                        | 60.52               | -2.57               | 9.66                | 2.28               | 8.80                   | 99.72                   | 34.08               |
|           |     | <b>11.88 ± 2.12</b>    | <b>55.06 ± 8.40</b>   | <b>0.52 ± 0.06</b>        | <b>34.38 ± 3.05</b>                    | <b>1.53 ± 0.07</b> | <b>12.98 ± 0.69</b> | <b>19.48 ± 0.53</b>        | <b>55.78 ± 0.04</b>        | <b>272.25 ± 0.35</b>       | <b>4.53 ± 0.03</b> | <b>41.93 ± 0.04</b>           | <b>103.75 ± 0.35</b>          | <b>61.07 ± 0.55</b> | <b>-2.32 ± 0.25</b> | <b>9.23 ± 0.44</b>  | <b>3.15 ± 1.23</b> | <b>9.91 ± 1.57</b>     | <b>99.63 ± 0.14</b>     | <b>34.22 ± 0.19</b> |
| 80        | PSD | 10.54                  | 41.87                 | 0.50                      | 32.00                                  | 1.47               | 14.47               | 15.50                      | 49.00                      | 108.00                     | 1.89               | 31.90                         | 56.90                         | 59.36               | -2.07               | 9.63                | 2.77               | 35.95                  | 98.51                   | 35.37               |
|           |     | 9.98                   | 45.10                 | 0.50                      | 33.00                                  | 1.99               | 14.48               | 15.45                      | 49.25                      | 111.50                     | 1.95               | 32.05                         | 58.00                         | 61.31               | -2.09               | 9.92                | 4.11               | 27.59                  | 98.13                   | 35.46               |
|           |     | <b>10.26 ± 0.39</b>    | <b>43.48 ± 2.29</b>   | <b>0.50 ± 0.01</b>        | <b>32.50 ± 0.71</b>                    | <b>1.48 ± 0.02</b> | <b>14.48 ± 0.01</b> | <b>15.48 ± 0.04</b>        | <b>49.13 ± 0.18</b>        | <b>109.75 ± 2.48</b>       | <b>1.92 ± 0.04</b> | <b>31.98 ± 0.12</b>           | <b>57.45 ± 0.78</b>           | <b>60.34 ± 0.98</b> | <b>-2.08 ± 0.01</b> | <b>9.78 ± 0.14</b>  | <b>3.44 ± 0.95</b> | <b>31.77 ± 5.91</b>    | <b>98.32 ± 0.27</b>     | <b>35.42 ± 0.06</b> |
|           | SD  | 11.91                  | 44.24                 | 0.55                      | 27.47                                  | 1.38               | 11.32               | 9.13                       | 32.80                      | 86.70                      | 2.36               | 19.60                         | 51.10                         | 58.33               | -2.02               | 7.82                | 2.15               | 17.24                  | 99.45                   | 34.64               |
|           |     | 10.36                  | 49.34                 | 0.51                      | 34.69                                  | 1.53               | 11.19               | 8.93                       | 32.50                      | 86.10                      | 2.37               | 19.30                         | 50.60                         | 63.88               | -2.30               | 8.55                | 4.66               | 4.82                   | 99.68                   | 34.34               |
|           |     | <b>11.14 ± 1.09</b>    | <b>46.79 ± 3.61</b>   | <b>0.53 ± 0.03</b>        | <b>31.08 ± 5.11</b>                    | <b>1.46 ± 0.11</b> | <b>11.25 ± 0.07</b> | <b>9.03 ± 0.14</b>         | <b>32.65 ± 0.21</b>        | <b>86.40 ± 0.42</b>        | <b>2.37 ± 0.01</b> | <b>19.45 ± 0.21</b>           | <b>50.85 ± 0.35</b>           | <b>61.11 ± 2.78</b> | <b>-2.16 ± 0.14</b> | <b>8.19 ± 0.36</b>  | <b>3.40 ± 1.77</b> | <b>11.03 ± 8.78</b>    | <b>99.57 ± 0.16</b>     | <b>34.49 ± 0.21</b> |
| 90        | PSD | 11.27                  | 39.32                 | 0.43                      | 36.21                                  | 1.57               | 15.82               | 14.60                      | 43.70                      | 91.40                      | 1.90               | 29.20                         | 49.20                         | 58.65               | -2.00               | 10.17               | 2.34               | 16.87                  | 98.38                   | 34.06               |
|           |     | 9.33                   | 43.13                 | 0.47                      | 33.96                                  | 1.51               | 14.70               | 14.65                      | 43.65                      | 91.40                      | 1.76               | 29.20                         | 49.15                         | 60.16               | -2.06               | 9.86                | 1.59               | 19.17                  | 98.16                   | 34.10               |
|           |     | <b>10.30 ± 1.38</b>    | <b>41.23 ± 2.70</b>   | <b>0.45 ± 0.03</b>        | <b>35.08 ± 1.59</b>                    | <b>1.54 ± 0.04</b> | <b>15.26 ± 0.61</b> | <b>14.63 ± 0.04</b>        | <b>43.68 ± 0.04</b>        | <b>91.40 ± 0.01</b>        | <b>1.83 ± 0.10</b> | <b>29.20 ± 0.01</b>           | <b>49.18 ± 0.04</b>           | <b>59.41 ± 075</b>  | <b>-2.03 ± 0.03</b> | <b>10.01 ± 0.16</b> | <b>1.96 ± 0.53</b> | <b>18.02 ± 1.62</b>    | <b>98.27 ± 0.16</b>     | <b>34.08 ± 0.03</b> |
|           | SD  | 12.11                  | 41.82                 | 0.51                      | 32.65                                  | 1.48               | 15.65               | 9.89                       | 38.00                      | 109.00                     | 2.61               | 21.50                         | 59.50                         | 59.19               | -2.55               | 10.52               | 3.12               | 10.70                  | 99.36                   | 35.86               |
|           |     | 9.98                   | 46.49                 | 0.47                      | 39.25                                  | 1.65               | 11.79               | 9.47                       | 37.40                      | 102.00                     | 2.47               | 20.90                         | 54.50                         | 58.64               | -2.00               | 8.08                | 2.32               | 13.65                  | 99.19                   | 35.58               |
|           |     | <b>11.04 ± 1.50</b>    | <b>44.15 ± 3.30</b>   | <b>0.49 ± 0.03</b>        | <b>35.95 ± 4.67</b>                    | <b>1.57 ± 0.11</b> | <b>13.71 ± 2.13</b> | <b>9.68 ± 0.30</b>         | <b>37.70 ± 0.42</b>        | <b>105.50 ± 4.95</b>       | <b>2.54 ± 0.09</b> | <b>21.20 ± 0.42</b>           | <b>57.00 ± 3.54</b>           | <b>58.92 ± 0.28</b> | <b>-2.27 ± 0.27</b> | <b>9.30 ± 1.22</b>  | <b>2.72 ± 0.57</b> | <b>12.18 ± 2.09</b>    | <b>99.27 ± 0.13</b>     | <b>35.72 ± 0.19</b> |
| 100       | PSD | 11.64                  | 51.51                 | 0.40                      | 37.90                                  | 1.61               | 14.51               | 12.80                      | 37.30                      | 75.80                      | 1.69               | 24.70                         | 41.40                         | 59.79               | -1.81               | 9.54                | 1.00               | 9.39                   | 98.59                   | 36.20               |
|           |     | 8.30                   | 42.83                 | 0.48                      | 28.85                                  | 1.41               | 14.73               | 12.60                      | 37.20                      | 75.70                      | 1.70               | 24.20                         | 41.30                         | 62.71               | -2.06               | 10.23               | 0.63               | 5.01                   | 98.20                   | 35.79               |
|           |     | <b>9.97 ± 2.36</b>     | <b>47.11 ± 6.14</b>   | <b>0.44 ± 0.05</b>        | <b>33.37 ± 6.40</b>                    | <b>1.51 ± 0.15</b> | <b>14.62 ± 0.12</b> | <b>12.70 ± 0.14</b>        | <b>37.25 ± 0.07</b>        | <b>75.75 ± 0.07</b>        | <b>1.69 ± 0.01</b> | <b>24.45 ± 0.35</b>           | <b>41.35 ± 0.07</b>           | <b>61.25 ± 1.46</b> | <b>-1.94 ± 0.13</b> | <b>9.89 ± 0.35</b>  | <b>0.82 ± 0.26</b> | <b>7.20 ± 3.10</b>     | <b>98.39 ± 0.28</b>     | <b>35.99 ± 0.28</b> |
|           | SD  | 10.29                  | 54.79                 | 0.44                      | 30.09                                  | 1.43               | 14.30               | 26.00                      | 57.90                      | 145.00                     | 2.06               | 43.50                         | 79.00                         | 59.59               | -2.38               | 9.78                | 2.57               | 16.11                  | 99.66                   | 35.86               |
|           |     | 10.04                  | 51.52                 | 0.40                      | 36.51                                  | 1.58               | 12.36               | 25.95                      | 57.90                      | 145.00                     | 2.06               | 43.55                         | 79.05                         | 61.95               | -2.22               | 8.94                | 2.53               | 3.08                   | 99.50                   | 35.06               |
|           |     | <b>10.16 ± 0.18</b>    | <b>53.15 ± 2.32</b>   | <b>0.42 ± 0.03</b>        | <b>33.30 ± 4.54</b>                    | <b>1.50 ± 0.10</b> | <b>13.33 ± 1.06</b> | <b>25.98 ± 0.04</b>        | <b>57.90 ± 0.01</b>        | <b>145.00 ± 0.01</b>       | <b>2.06 ± 0.01</b> | <b>43.53 ± 0.04</b>           | <b>79.03 ± 0.04</b>           | <b>60.77 ± 1.18</b> | <b>-2.30 ± 0.08</b> | <b>9.36 ± 0.42</b>  | <b>2.55 ± 0.03</b> | <b>9.60 ± 9.21</b>     | <b>99.58 ± 0.11</b>     | <b>35.46 ± 0.56</b> |

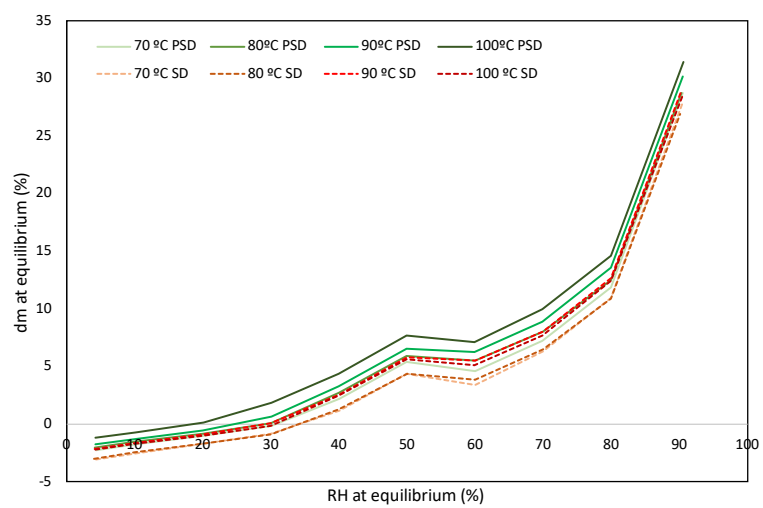

**Figure S1.** Mass increment (%) versus the relative humidity of SMP obtained by Spray Drying (SD) and pulse Spray Drying (PSD) at different outlet temperatures (70, 80, 90 and 100 °C).
